# Supplementary material for: Axon-dependent expression of YAP/TAZ mediates Schwann cell remyelination but not proliferation after nerve injury
Source: eLife journal article supplement (doi:10.7554/elife.50138), 2020-05-21
Supplement: fig3-data3 [file Mann Whitney data.xlsx]

## Sheet: Sheet1
Two-sample Wilcoxon rank-sum (Mann-Whitney) test for two groups.							1 = WT	2 = Yap/Taz iDKO
Figure 3
Figure 3-S1E	p = .5127		Figure 3F	p=.0495		Figure 3G	p=0.0463		Figure 3H	p=0.5127		Figure 3I	p=0.8273
1	195		1	85.4		1	12.7		1	40.1		1	286
1	213		1	72.2		1	13		1	40.9		1	248
1	231		1	81.2		1	12.7		1	40.4		1	263
2	190		2	20.9		2	13.7		2	40		2	247
2	202		2	23.4		2	19		2	40.8		2	313
2	227.5		2	20.2		2	16.8		2	40.3		2	275
Figure 4E	p=0.1266		Figure 4F	p=0.0495		Figure 4G	p=0.5127		Figure 4H	p=0.8273
1	68.2		1	71.6		1	93		1	74.8
1	65.4		1	70.9		1	76.5		1	77.6
1	82.6		1	73.4		1	92		1	74
2	88.6		2	75		2	90.9		2	81.6
2	79.5		2	76.7		2	92.7		2	75.6
2	84.3		2	75.4		2	97.4		2	72.4
Figure 5F			Figure 5G	p=0.7237		Figure 5H	p=0.1573		Figure 5I	p=.0339		Figure 6E	p = 0.2752		Figure 6F	p = 0.8273
1	29.9		1	84.7		1	69.9		1	32.1		1	12.55		1	5.5873
1	20		1	84.3		1	56.7		1	23.4		1	14.68		1	4.9024
1	16		1	87.7		1	62.7		1	28.2		1	7.135		1	3.2451
1	23		1	89.7		1	60.4		1	21.8		2	17.52		2	4.7918
2	22		2	87.5		2	63.7		2	47.5		2	12.07		2	4.778
2	20		2	84.2		2	64.1		2	48.3		2	17.14		2	5.5762
2	16		2	88.5		2	70.9		2	58.2
Figure 7F	p=0.0323		Figure 7G	p=0.0495
1	76.2		1	0.884
1	71.5		1	0.841
1	55.9		1	0.845
1	74.7		2	1
2	0		2	0.998
2	0		2	0.995
2	4
Figure 8A Taz	p=0.0495		Figure 8A Yap	p=0.2752		Figure 8-S1E	p = 0.2118
1	1.35		1	1.123		1	29.9
1	0.7		1	0.82		1	20
1	0.95		1	1.06		1	16
2	0.1		2	0.982		1	23
2	0.07		2	1.43		2	23
2	0.085		2	1.3		2	31.4
						2	27
